# Supplementary material for: Anti-apoptotic properties of carbon monoxide in porcine oocyte during in vitro aging
Source: PeerJ. 2017 Oct 6;5:e3876. doi: 10.7717/peerj.3876 (PMC5633033; doi:10.7717/peerj.3876)
Supplement: Data S1 [file peerj-05-3876-s002.docx]

| **Relative signal intensity of HO-1 in porcine oocytes during *in vitro* aging (mean** **±SEM)** | | | | |
| --- | --- | --- | --- | --- |
|  | **0 Hrs (MII)** | **24 Hrs** | **48 Hrs** | **72 Hrs** |
| **HO-1** | 1,00±0,07A | 2,20±0,16B | 3,51±0,26C | 6,66±1,26D |

| **Relative signal intensity of HO-2 in porcine oocytes during *in vitro* aging (mean** **±SEM)** | | | | |
| --- | --- | --- | --- | --- |
|  | **0 Hrs (MII)** | **24 Hrs** | **48 Hrs** | **72 Hrs** |
| **HO-2** | 1,00±0,05A | 1,33±0,08B | 1,67±0,14C | 3,13±0,56D |

Porcine oocytes were cultivated to metaphase II (MII) or exposed to *in vitro* aging for 24, 48 or 72 hours. The results are presented as the ratio relative to the group of oocytes at metaphase II. A,B,C,D Statistically signifficant differences in the signal intensity are indicated with different superscripts (P<0.05). The Measurement of signal intensity was performed on 15 oocytes for each experimental group.
