# Supplementary material for: Anti-apoptotic properties of carbon monoxide in porcine oocyte during in vitro aging
Source: PeerJ. 2017 Oct 6;5:e3876. doi: 10.7717/peerj.3876 (PMC5633033; doi:10.7717/peerj.3876)
Supplement: Data S2 [file peerj-05-3876-s003.docx]

| Effect of heme oxygenase inhibitor (Zn-PP IX) on porcine oocytes after 24 hrs *in vitro* aging (mean±SEM) | | | | |
| --- | --- | --- | --- | --- |
|  | 0 µM | 2,5 µM | 5 µM | 25 µM |
| MII | 94,01±1,54A | 93,96±0,52A | 93,46±0,91A | 83,41±2,09B |
| A | 1,74±2,65A | 1,08±1,08A | 1,95±1,18A | 8,54±1,93A |
| L | 2,11±0,75A | 2,74±1,46A | 0,00±0,00A | 3,17±2,33A |
| PA | 2,14±0,61A | 2,22±2,22A | 4,59±1,97A | 4,88±0,75A |

| Effect of heme oxygenase inhibitor (Zn-PP IX) on porcine oocytes after 48 hrs *in vitro* aging (mean±SEM) | | | | |
| --- | --- | --- | --- | --- |
|  | 0 µM | 2,5 µM | 5 µM | 25 µM |
| MII | 67,09±1,64A | 54,17±2,08B | 55,99±1,65B | 55,03±2,05B |
| A | 21,45±2,28A | 30,83±2,42B | 27,0±1,14B | 27,83±1,29B |
| L | 1,12±1,52A | 2,08±2,08A | 4,65±1,35A | 9,43±1,63B |
| PA | 10,35±1,01A | 12,92±3,97A | 12,37±2,79A | 7,72±2,08A |

| Effect of heme oxygenase inhibitor (Zn-PP IX) on porcine oocytes after 72 hrs *in vitro* aging (mean±SEM) | | | | |
| --- | --- | --- | --- | --- |
|  | 0 µM | 2,5 µM | 5 µM | 25 µM |
| MII | 17,46±2,74A | 17,38±3,58A | 15,14±2,65A | 12,89±2,07A |
| A | 60,44±3,73A | 64,27±2,53A | 61,39±4,9A | 67,46±3,44A |
| L | 1,84±0,96A | 1,32±1,32A | 3,64±2,18A | 2,22±2,22A |
| PA | 20,26±2,13A | 17,03±3,51A | 19,82±3,96A | 17,43±2,78A |

The effect of heme oxygenase inhibitor Zn-PP IX on porcine oocytes during *in vitro* aging. Oocytes were cultivated to metaphase II and then exposed to *in vitro* aging in a modified M199 medium supplemented with Zn-PP IX at concentrations 2,5; 5; 25 μM for 24, 48 or 72 hours. Control group of oocytes were cultivated in medium containing DMSO. A,B Statistically significant differences (in rows) in the ratio of oocytes are indicated with different superscripts (P<0.05). The total number of oocytes in each experimental group was 120. *MII - metaphase II (intact) oocytes; A - apoptotic oocytes; L - lytic oocytes; PA - parthenogenetically activated oocytes.*
