# Supplementary material for: Anti-apoptotic properties of carbon monoxide in porcine oocyte during in vitro aging
Source: PeerJ. 2017 Oct 6;5:e3876. doi: 10.7717/peerj.3876 (PMC5633033; doi:10.7717/peerj.3876)
Supplement: Data S3 [file peerj-05-3876-s004.docx]

| Effect of carbon monoxide donor CORM-A1 on porcine oocytes after 24 hrs *in vitro* aging (mean±SEM) | | | | |
| --- | --- | --- | --- | --- |
|  | C | 25 µM | 50 µM | 100 µM |
| MII | 93,52±3,34A | 96,67±3,33A | 97,22±2,78A | 94,1±2,44A |
| A | 4,63±2,45A | 0,00±0,00A | 2,78±2,78A | 4,17±4,17A |
| L | 1,85±1,85A | 0,00±0,00A | 0,00±0,00A | 0,00±0,00A |
| PA | 0,00±0,00A | 3,33±3,33A | 0,00±0,00A | 1,73±1,73A |

| Effect of carbon monoxide donor CORM-A1 on porcine oocytes after 48 hrs *in vitro* aging (mean±SEM) | | | | |
| --- | --- | --- | --- | --- |
|  | C | 25 µM | 50 µM | 100 µM |
| MII | 59,75±3,64A | 75,7±3,72B | 72,34±3,78B | 62,18±9,55A |
| A | 30,00±4,31A | 15,64±5,76B | 19,82±4,61B | 27,32±9,52A |
| L | 4,58±1,98A | 2,67±1,63A | 0,00±0,00A | 0,00±0,00A |
| PA | 5,67±2,67A | 6,00±4,00A | 7,85±1,54A | 10,5±3,43A |

| Effect of carbon monoxide donor CORM-A1 on porcine oocytes after 72 hrs *in vitro* aging (mean±SEM) | | | | |
| --- | --- | --- | --- | --- |
|  | C | 25 µM | 50 µM | 100 µM |
| MII | 28,83±3,70A | 24,73±3,49A | 40,04±7,25B | 41,33±6,04B |
| A | 59,46±3,59A | 60,5±6,01A | 45,16±7,28B | 47,21±3,15B |
| L | 1,86±1,21A | 0,00±0,00A | 2,50±2,50A | 0,00±0,00A |
| PA | 9,85±3,40A | 14,78±5,35A | 12,3±3,35A | 11,46±6,19A |

The effect of carbon monoxide donor CORM-A1 on porcine oocytes during *in vitro* aging. Oocytes were cultivated to metaphase II and then exposed to *in vitro* aging in a modified M199 medium supplemented with CORM-A1 at concentrations 25; 50; 100 μM for 24, 48 or 72 hours. Control group (C) of oocytes were cultivated in medium containing iCORM-A1. A,B Statistically signifficant differences (in rows) in the ratio of oocytes are indicated with different superscripts (P<0.05). The total number of oocytes in each experimental group was 120. *MII - metaphase II (intact) oocytes; A - apoptotic oocytes; L - lytic oocytes; PA - parthenogenetically activated oocytes.*
